# Supplementary material for: Suicide in Sri Lanka 1975–2012: age, period and cohort analysis of police and hospital data
Source: PubMed Central journal article supplement (PMC4148962; doi:10.1186/1471-2458-14-839), 2014-08-13
Supplement: 12889_2014_6975_MOESM2_ESM.pdf [file 12889_2014_6975_MOESM2_ESM.pdf]

Supplementary figure 3 – Age profile of suicide by gender and method

a) 1982-84\* - MALE

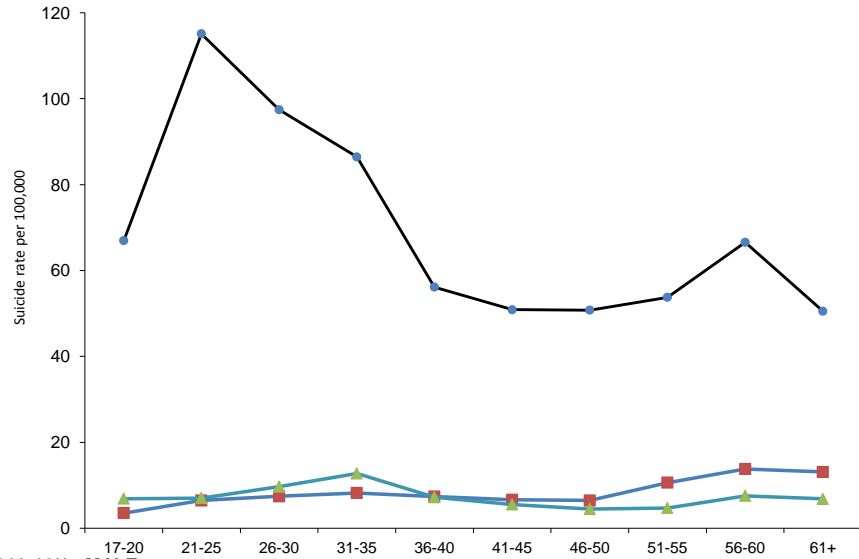

b) 1982-84\* - FEMALE

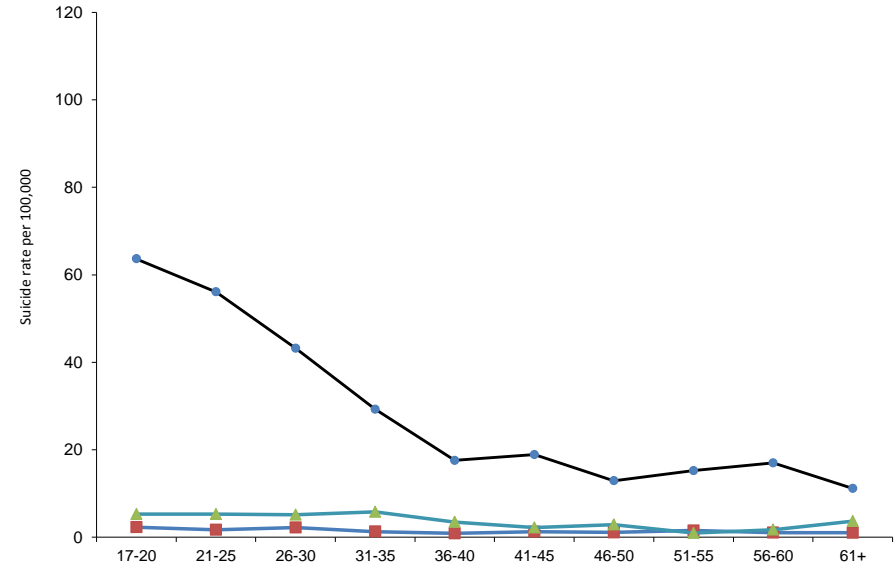

c) 2010-12\*\* - MALE

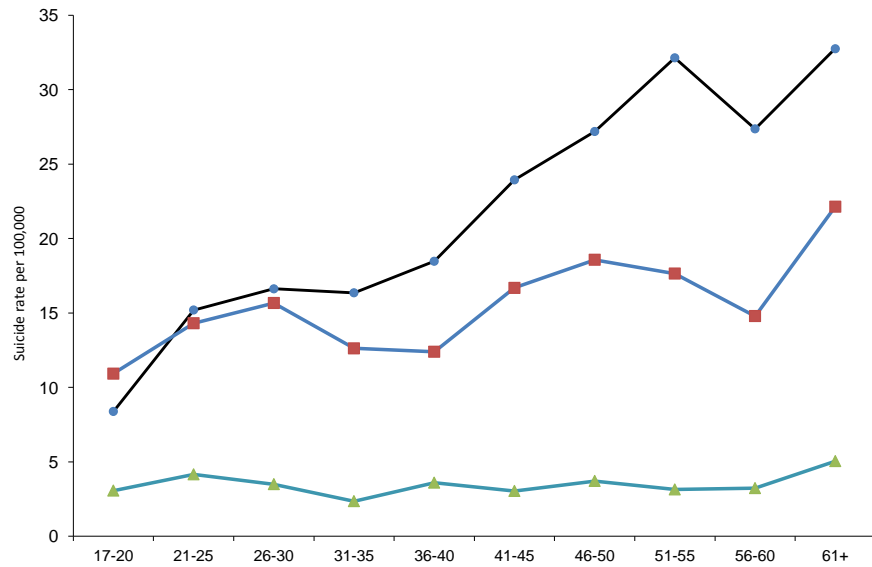

d) 2010-12\*\* - FEMALE

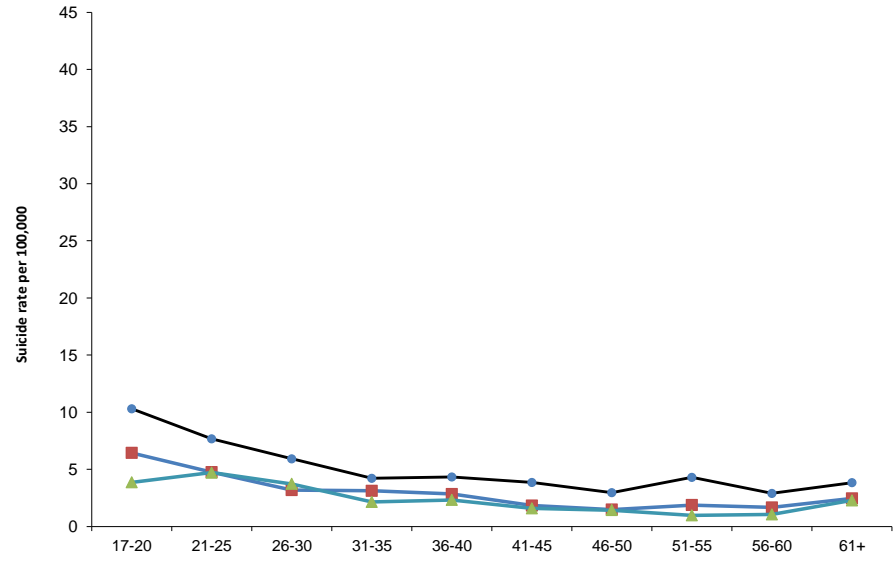

Denominator 1983 mid-year population, \*\*Denominator 2011

—●— Poisoning —■— Hanging —▲— Other methods
