# Supplementary material for: Suicide in Sri Lanka 1975–2012: age, period and cohort analysis of police and hospital data
Source: PubMed Central journal article supplement (PMC4148962; doi:10.1186/1471-2458-14-839), 2014-08-13
Supplement: 12889_2014_6975_MOESM3_ESM.pdf [file 12889_2014_6975_MOESM3_ESM.pdf]

Supplementary figure 4 – Hospital Poisoning admissions by gender (2004-2010)

**a) Male**

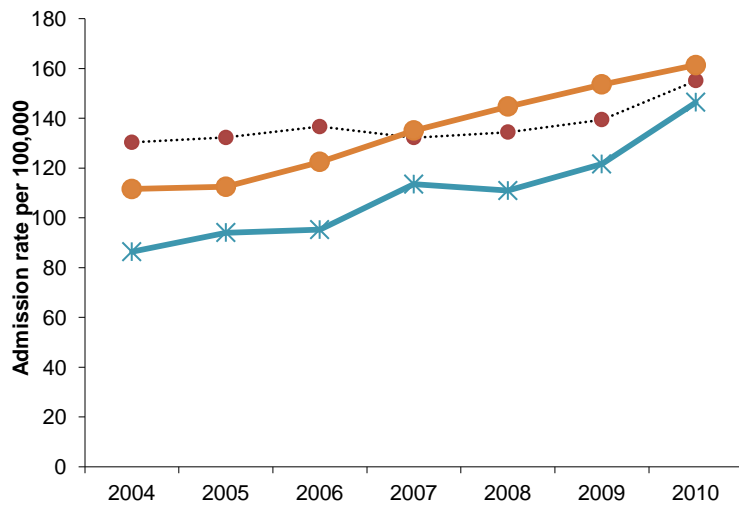

**b) Female**

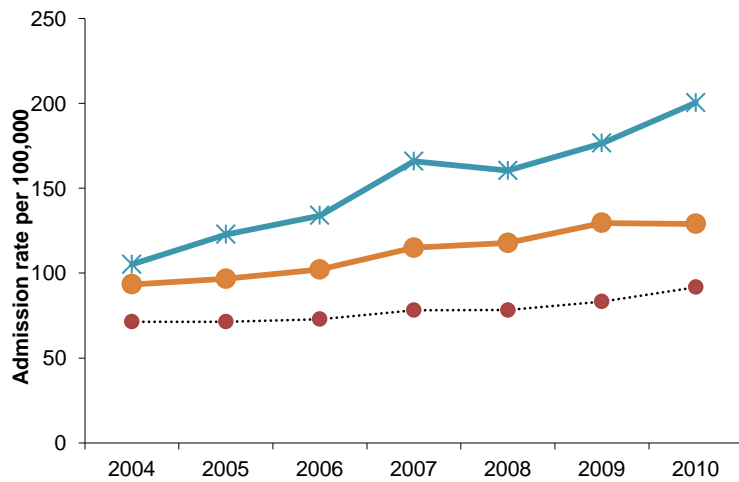

...●... All Pesticide admissions                      —\*— All admission for poisoning with medicines  
—●— All Other poisoning admissions
